# Supplementary material
Source: Research Square preprint supplement (doi:10.21203/rs.3.rs-9823210/v1)

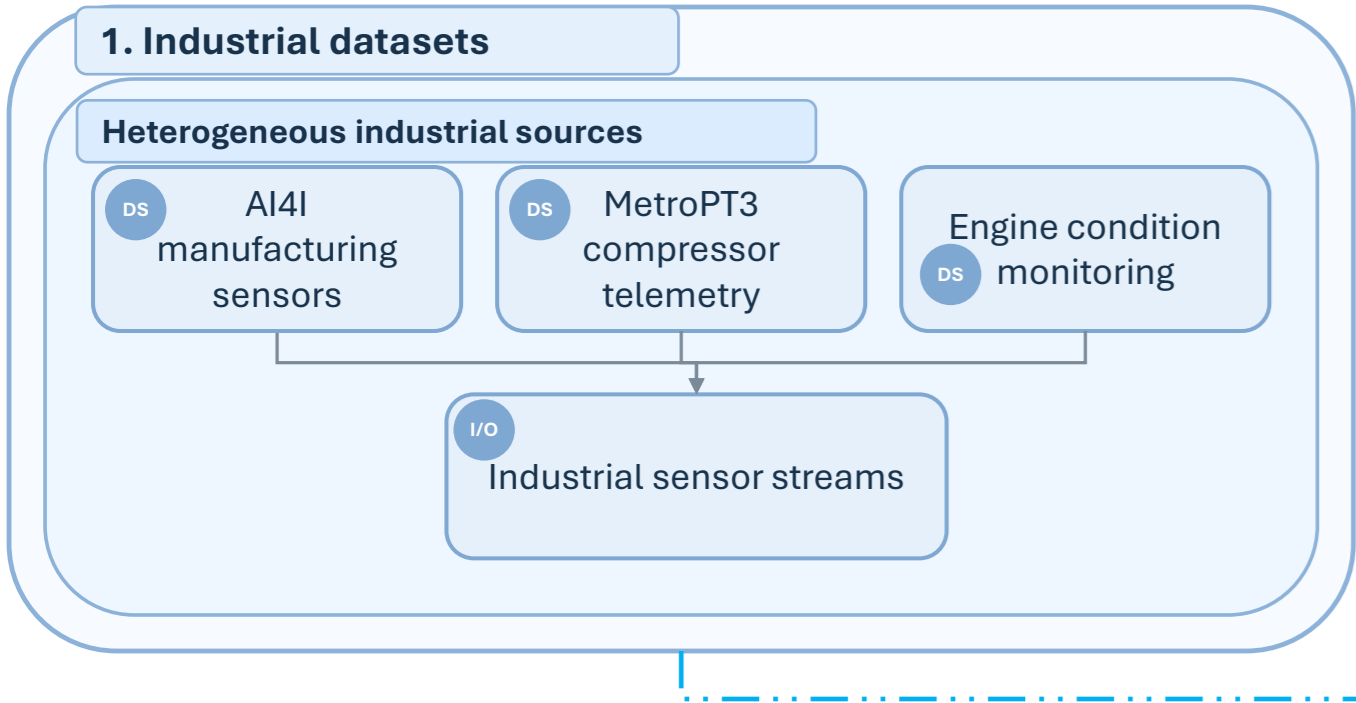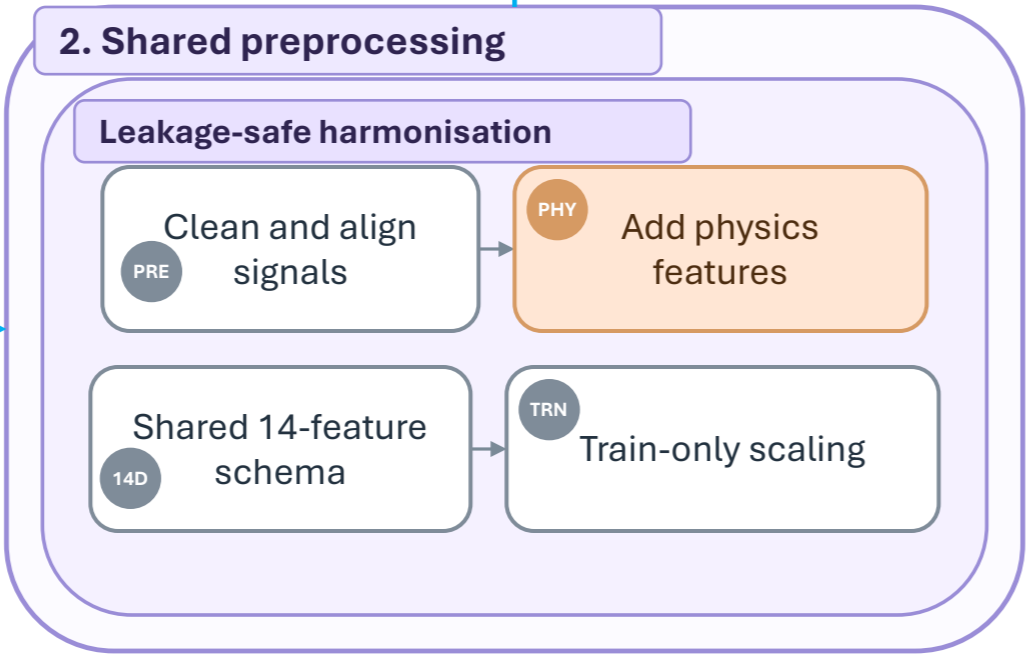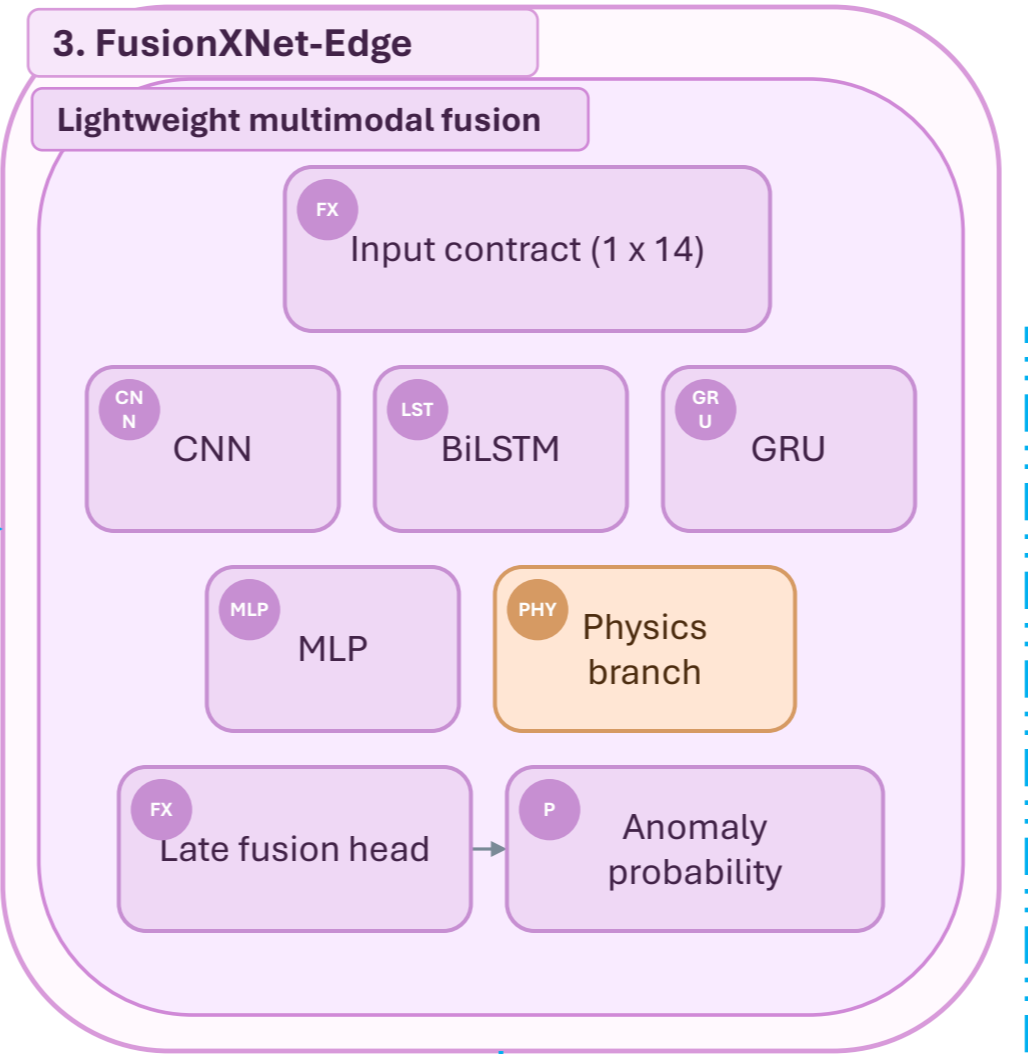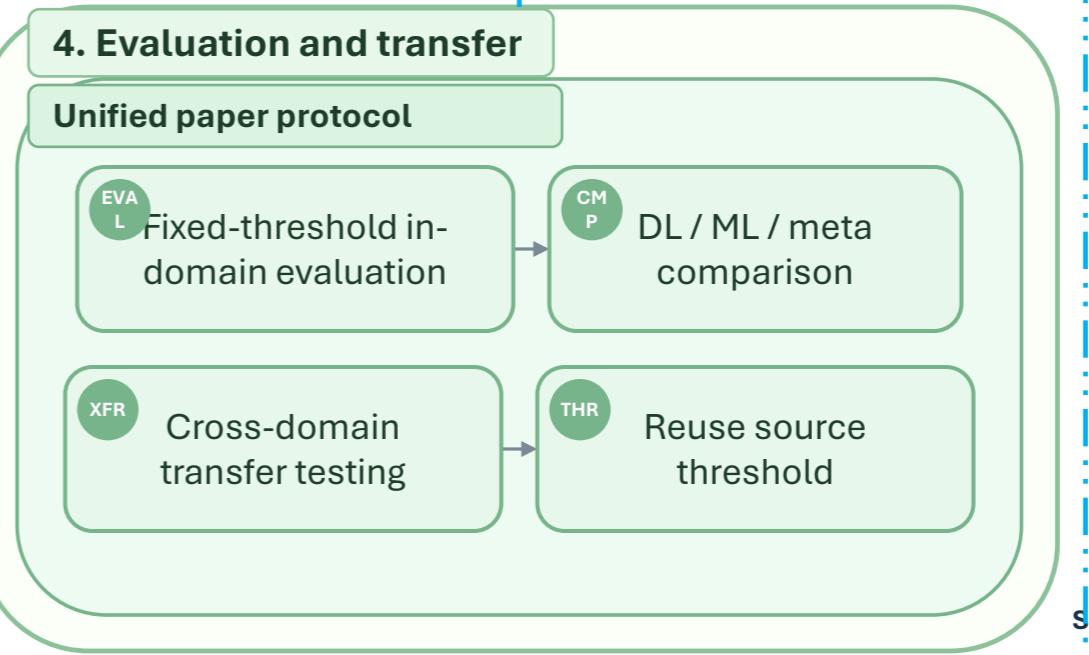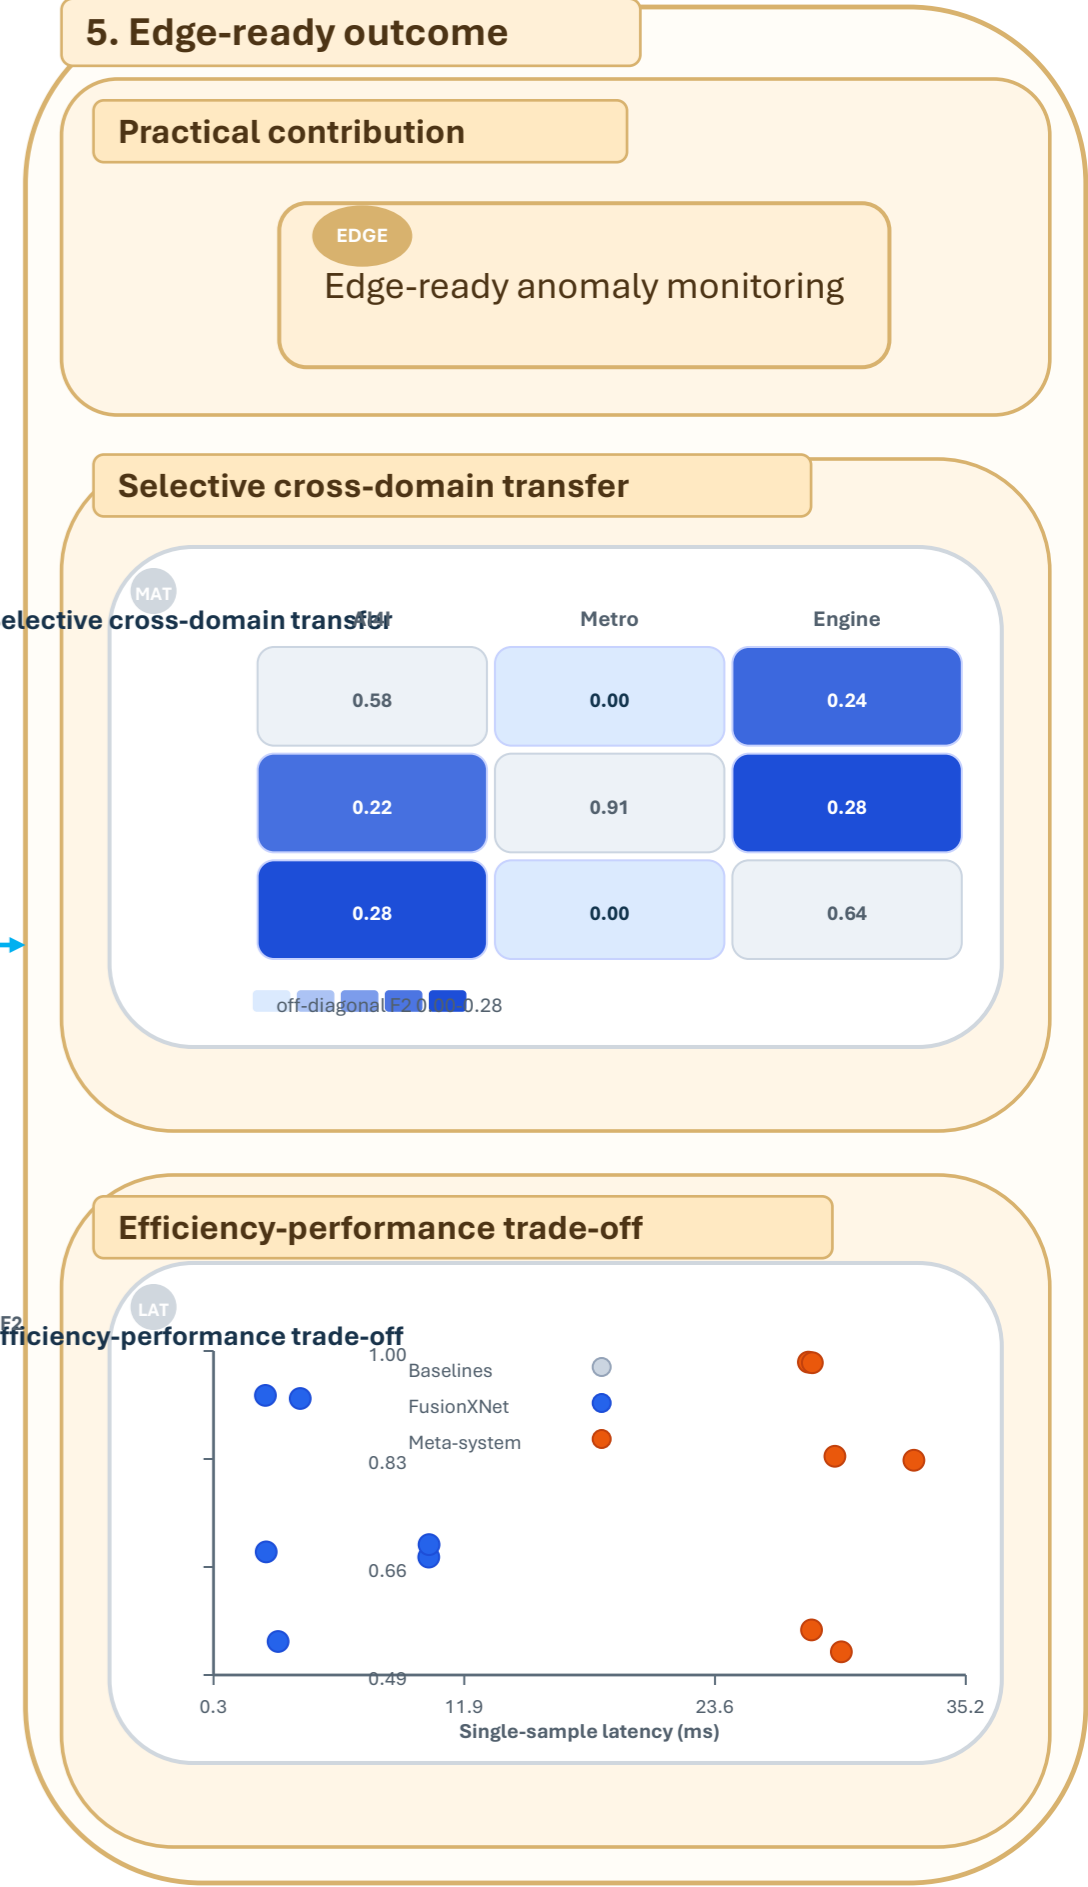

Supplement: Supplementary file 2 [file c92ed9ef43e4470911fc5c43.pdf]
